# Supplementary material
Source: PubMed Central journal article supplement (PMC7772749)
Supplement: mmc1.pdf [file mmc1.pdf]

**Immunity, Volume 53**

**Supplemental Information**

**Cross-Neutralization of a SARS-CoV-2 Antibody to a  
Functionally Conserved Site Is Mediated by Avidity**

**Hejun Liu, Nicholas C. Wu, Meng Yuan, Sandhya Bangaru, Jonathan L. Torres, Tom G. Caniels, Jelle van Schooten, Xueyong Zhu, Chang-Chun D. Lee, Philip J.M. Brouwer, Marit J. van Gils, Rogier W. Sanders, Andrew B. Ward, and Ian A. Wilson**

**A**

CDR H1

COVA1-16: QVQLVQSGAEVKKPGASVKVSCASG**YTFTSY**YMHWVRQAPGQ  
 IGHV1-46: QVQLVQSGAEVKKPGASVKVSCASGYTFTSY**YMHWVRQAPGQ**  
31 32 33 34 35

CDR H2

COVA1-16: GLEWMGIIN**SSGG**STSYAQKFQGRVTMTRDTSTSTVYME**LSSL**  
 IGHV1-46: GLEWMGIIN**PSGG**STSYAQKFQGRVTMTRDTSTSTVYME**LSSL**  
50 51 52 53 54 55 56 57 58 59 60 61 62 63 64 65

CDR3 H3

COVA1-16: RSEDTAVYYCAR**PPRNY**YDRSGYYQRAE**YFQH**WGQGLVTVSS  
 IGHV1-46: RSEDTAVYYCAR-----  
95 96 97 98 99 100 100a 100b 100c 100d 100e 100f 100g 100h 100i 100j 100k 100l 101 102

**B**

CDR L1

COVA1-16: DIQ**L**TQSPSSLSASVGD**RVTITCQASQDISNYLNWYQQR**  
 IGKV1-33: DIQ**M**TQSPSSLSASVGD**RVTITCQASQDISNYLNWYQQR**  
24 25 26 27 28 29 30 31 32 33 34

CDR L2

COVA1-16: PGKAPKLLI**YDASNLET**GVPSRFSGSGSGTDF**TFTISSL**  
 IGKV1-33: PGKAPKLLI**YDASNLET**GVPSRFSGSGSGTDF**TFTISSL**  
50 51 52 53 54 55 56

CDR L3

COVA1-16: QPEDIATYYCQ**QYDNP**PLTFGGG**TKLEIK**  
 IGKV1-33: QPEDIATYYCQ**QYDNL**P-----  
88 89 90 91 92 93 94 95

**C**

C A R P P R N Y Y D R S G Y Y Q R A E Y F Q H W  
 TGTGCGAGGCCCCCTCGAAATTACTATGATAGGAGTGGTTATTATCAGAGGGCTGAATACTTCCAGCACTGG  
**Germline sequence:** ATTACTATGATAGTAGTGGTTATTA GCTGAATACTTCCAGCACTGG  
IGHD3-22 IGHJ1

Total gene-derived nucleotides: 46  
 Total non-gene-derived nucleotides: 18

1

2 **Figure S1, related to Figure 1. Comparison of COVA1-16 and putative germline**  
 3 **sequences.** Alignment of COVA1-16 Fab amino-acid sequence with **(A)** germline IGHV1-  
 4 46 sequence, and **(B)** germline IGKV1-33 sequence. The regions that correspond to CDR  
 5 H1, H2, H3, L1, L2, and L3 are indicated. Residues that differ from germline are highlighted  
 6 in red. COVA1-16 Fab residues that interact with the RBD are highlighted in yellow  
 7 [defined here as residues with a BSA > 0 Å<sup>2</sup> as calculated by the PISA program (Krissinel  
 8 and Henrick, 2007)]. Residue positions in the CDRs are labeled according to the Kabat

9 numbering scheme. **(C)** Amino acid and nucleotide sequences of the V-D-J junction of  
10 COVA1-16, with putative gene segments (blue) and N-regions from N-addition (red), are  
11 indicated. The germline sequences of IGHD3-22 and IGHJ1 are also shown. The only  
12 somatically mutated nucleotide in the D region is underlined that results in a V<sub>H</sub> S100bR  
13 mutation.

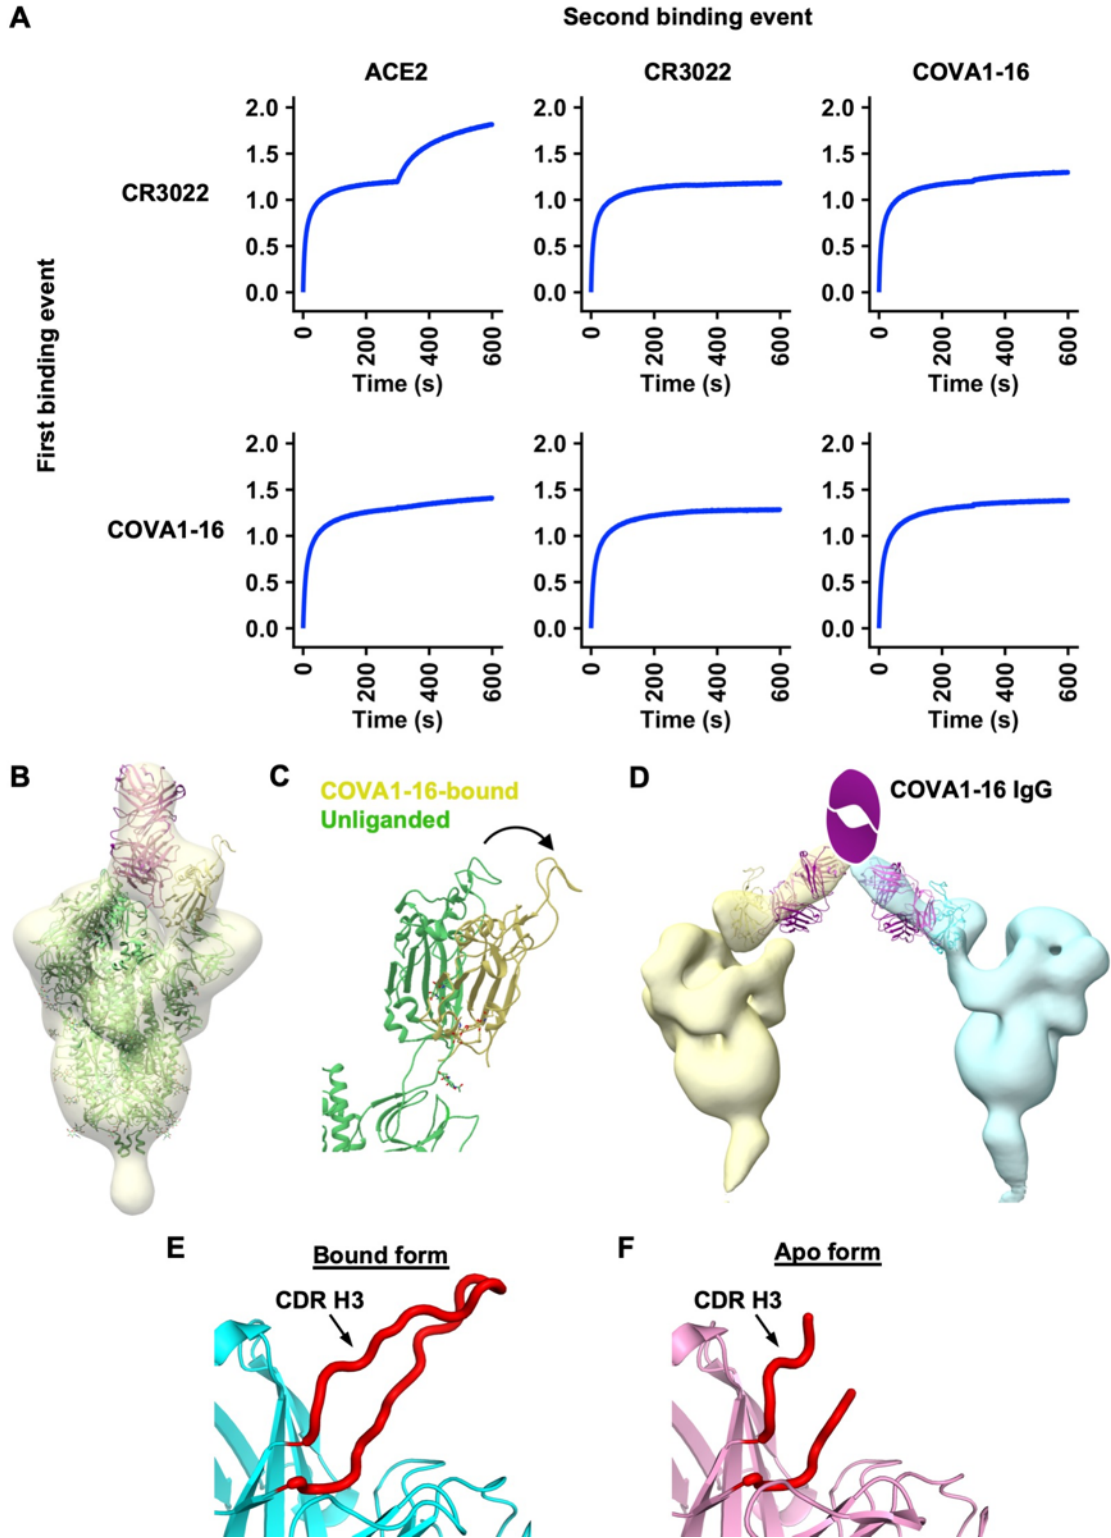

14

15 **Figure S2, related to Figures 2 and 3. Competition assay between different IgGs and**

16 **ACE2 and negative-stain EM analysis of COVA1-16 binding to SARS-CoV-2 S trimer.**

17 Competition between COVA1-16 IgG, CR3022 IgG, and Fc-tagged ACE2 was measured  
18 by biolayer interferometry (BLI). Y-axis represents the response. The biosensor was first  
19 loaded with SARS-CoV-2 RBD, followed by two binding events: 1) CR3022 IgG or  
20 COVA1-16 IgG, and 2) ACE2, CR3022 IgG, or COVA1-16 IgG. A period of 300 s was  
21 used for each binding event. A further increase in signal during the second binding event  
22 (starting at 300 s time point) indicates lack of competition with the first ligand. **(B)** An atomic  
23 model from the crystal structure of SARS-CoV-2 RBD bound to COVA1-16 Fab was fit  
24 into the negative-stain EM reconstruction of the SARS-CoV-2 spike bound to COVA1-16  
25 Fab. The COVA1-16 Fab approaches the apex of the S trimer in a perpendicular  
26 orientation. A secondary structure backbone representation of the prefusion spike model  
27 (PDB: 6Z97, green) (Huo et al., 2020) was also fit into the EM density with RBD residues  
28 (334-528) removed from one of the protomers here for clarity. The COVA1-16 heavy and  
29 light chains are in magenta and pink, respectively, and COVA1-16-bound RBD in yellow.

30 **(C)** Conformation of RBD in an up conformation from an unliganded SARS-CoV-2 S trimer  
31 (PDB: 6Z97, green) (Huo et al., 2020) is compared to that of the RBD (yellow) bound by  
32 COVA1-16 Fab. The arrow indicates that the RBD further rotates and opens up when  
33 bound to COVA1-16, thereby moving further away from the trimer threefold axis. **(D)** An  
34 atomic model of the spike RBD bound to COVA1-16 Fab is fit into a negative-stain EM  
35 reconstruction, where COVA1-16 Fab approaches the SARS-CoV-2 S trimer from the  
36 side. COVA1-16 is modelled as an IgG to illustrate the feasibility of bivalent binding to  
37 adjacent spike proteins on the virus surface. The Fab heavy and light chains are shown in  
38 magenta and pink. A schematic representation of the Fc domain of the IgG is shown in  
39 magenta. The RBD model and spike density for each trimer is shown in yellow and cyan.

40 **(E)** In the crystal structure of the RBD-bound form of COVA1-16 Fab, the CDR H3 loop is  
41 completely ordered (red). **(F)** In the crystal structure of the apo form of COVA1-16, the  
42 distal end of the CDR H3 loop is intrinsically disordered or flexible (red).

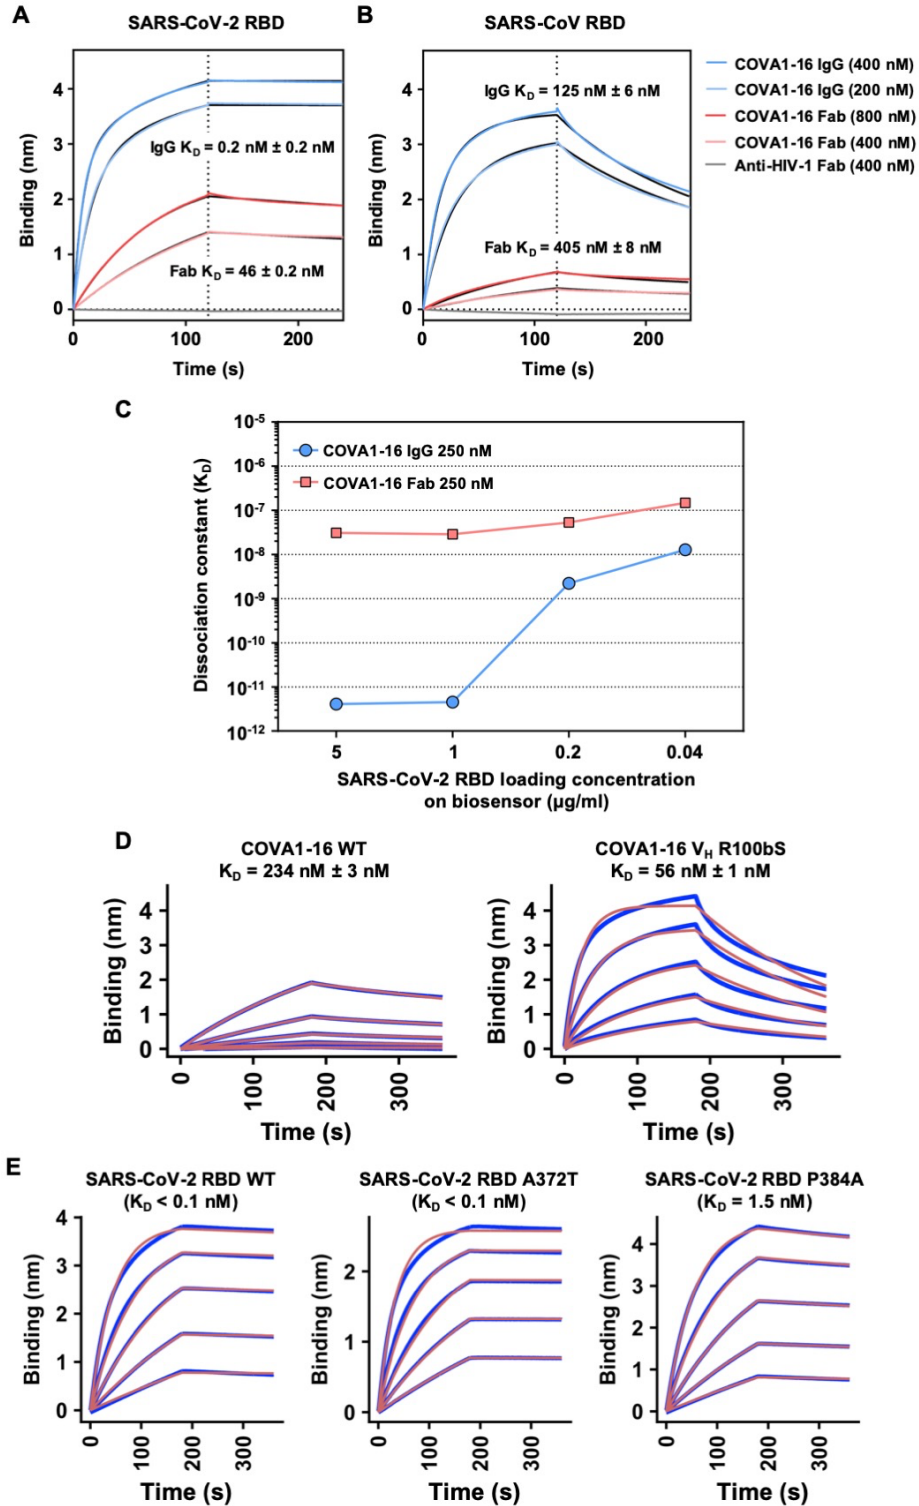

43

44 **Figure S3, related to Figures 2 and 3. Sensorgrams for binding of COVA1-16 to**

45 **SARS-CoV-2 RBD and SARS-CoV RBD. (A-B) Binding kinetics of COVA1-16 Fab and**

46 IgG to **(A)** SARS-CoV-2 RBD and **(B)** SARS-CoV RBD were measured by biolayer  
47 interferometry (BLI) with RBD on the biosensor and antibody in solution. An anti-HIV His-  
48 tagged Fab (4E1) was used as a negative control. **(C)** The relationship between SARS-  
49 CoV-2 RBD loading concentration on the biosensor and the dissociation constant of  
50 COVA1-16 IgG is shown. **(D)** Binding kinetics of COVA1-16 wild-type and V<sub>H</sub> R100bS  
51 mutant Fab to SARS-CoV-2 RBD were measured by biolayer interferometry (BLI) with  
52 RBD on the biosensor and antibody in solution. Unlike panels **A-C**, which used HEK293F-  
53 expressed SARS-CoV-2, the experiment here used insect cell-expressed SARS-CoV-2.  
54 **(E)** Binding kinetics of COVA1-16 IgG to SARS-CoV-2 RBD WT, A372T, and P384A were  
55 measured by biolayer interferometry (BLI) with RBD on the biosensor and antibody in  
56 solution. A372T and P384A are the only two mutations that differ between the SARS-CoV-  
57 2 and SARS-CoV sequences in COVA1-16 epitope. The affinity of COVA1-16 IgG to the  
58 A372T mutant did not show any detectable difference from WT. Although the affinity (K<sub>D</sub>)  
59 of COVA1-16 IgG to the P384A mutant decreases, the binding is still 100 times tighter  
60 than that measured between COVA1-16 IgG and SARS-CoV RBD (see panel **B**). For all  
61 sensorgrams in this figure, Y-axis represents the response. Dissociation constants (K<sub>D</sub>)  
62 for IgG and Fab were obtained using a 1:2 bivalent model and 1:1 binding model,  
63 respectively, which are represented by the red lines. Representative results of two  
64 replicates for each experiment are shown.  
65



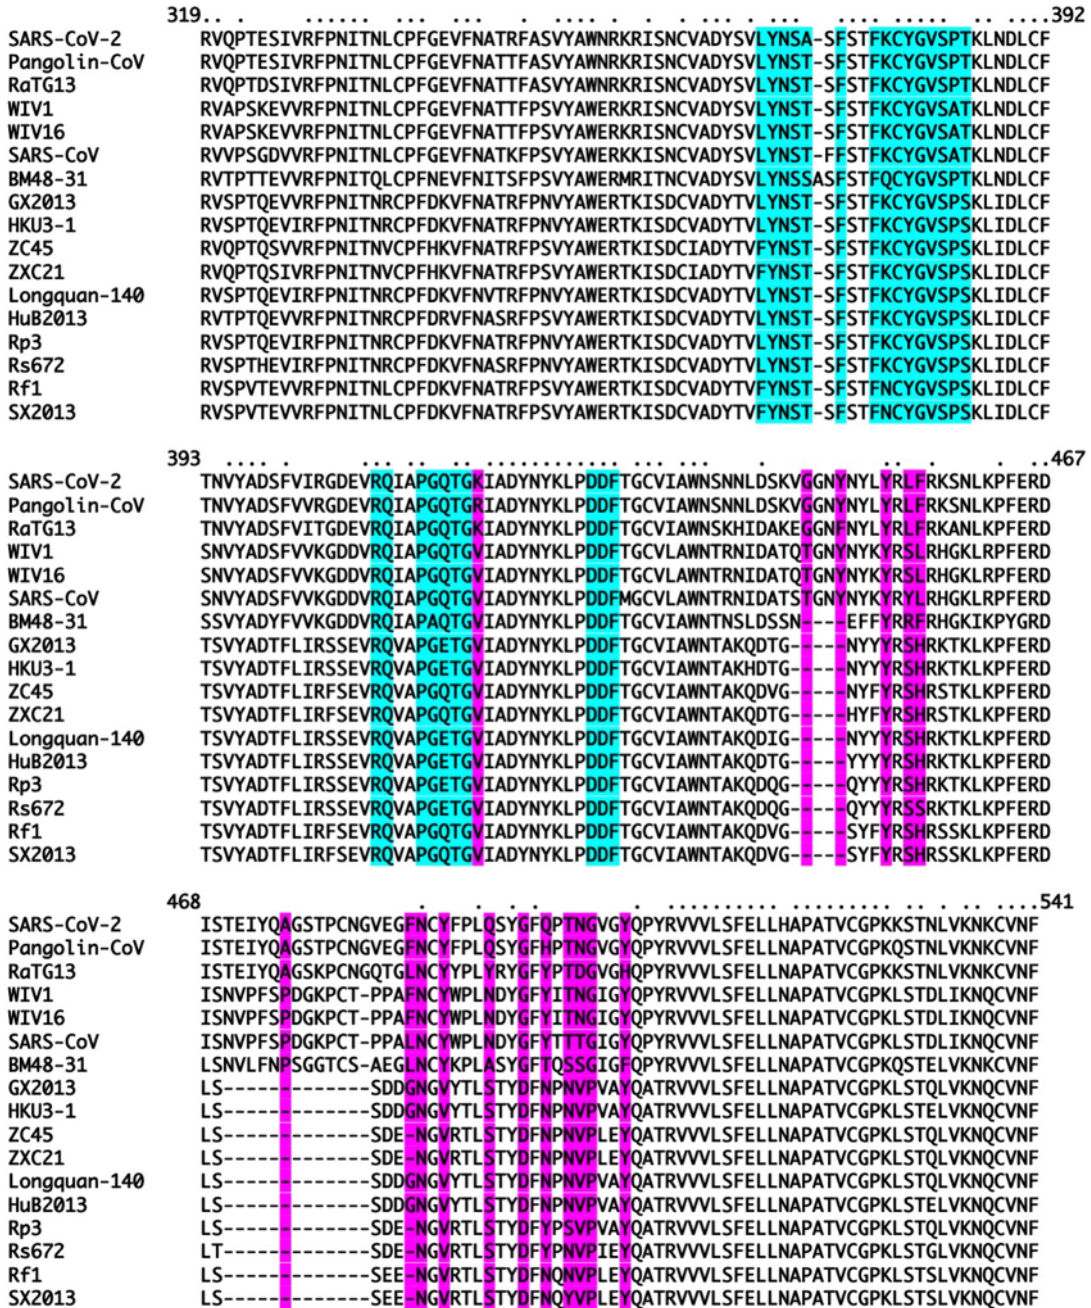

66

67 **Figure S4, related to Figure 4. Sequence alignment of the RBD from SARS-related**  
68 **coronaviruses.** Amino-acid sequences of RBDs from SARS-CoV-2, SARS-CoV, and  
69 other SARS-related coronavirus (SARSr-CoV) strains are aligned. COVA1-16 epitope  
70 residues are highlighted in cyan. ACE2-binding residues are highlighted in purple.  
71 Conserved residues are indicated by small black dots on the top of the alignment.



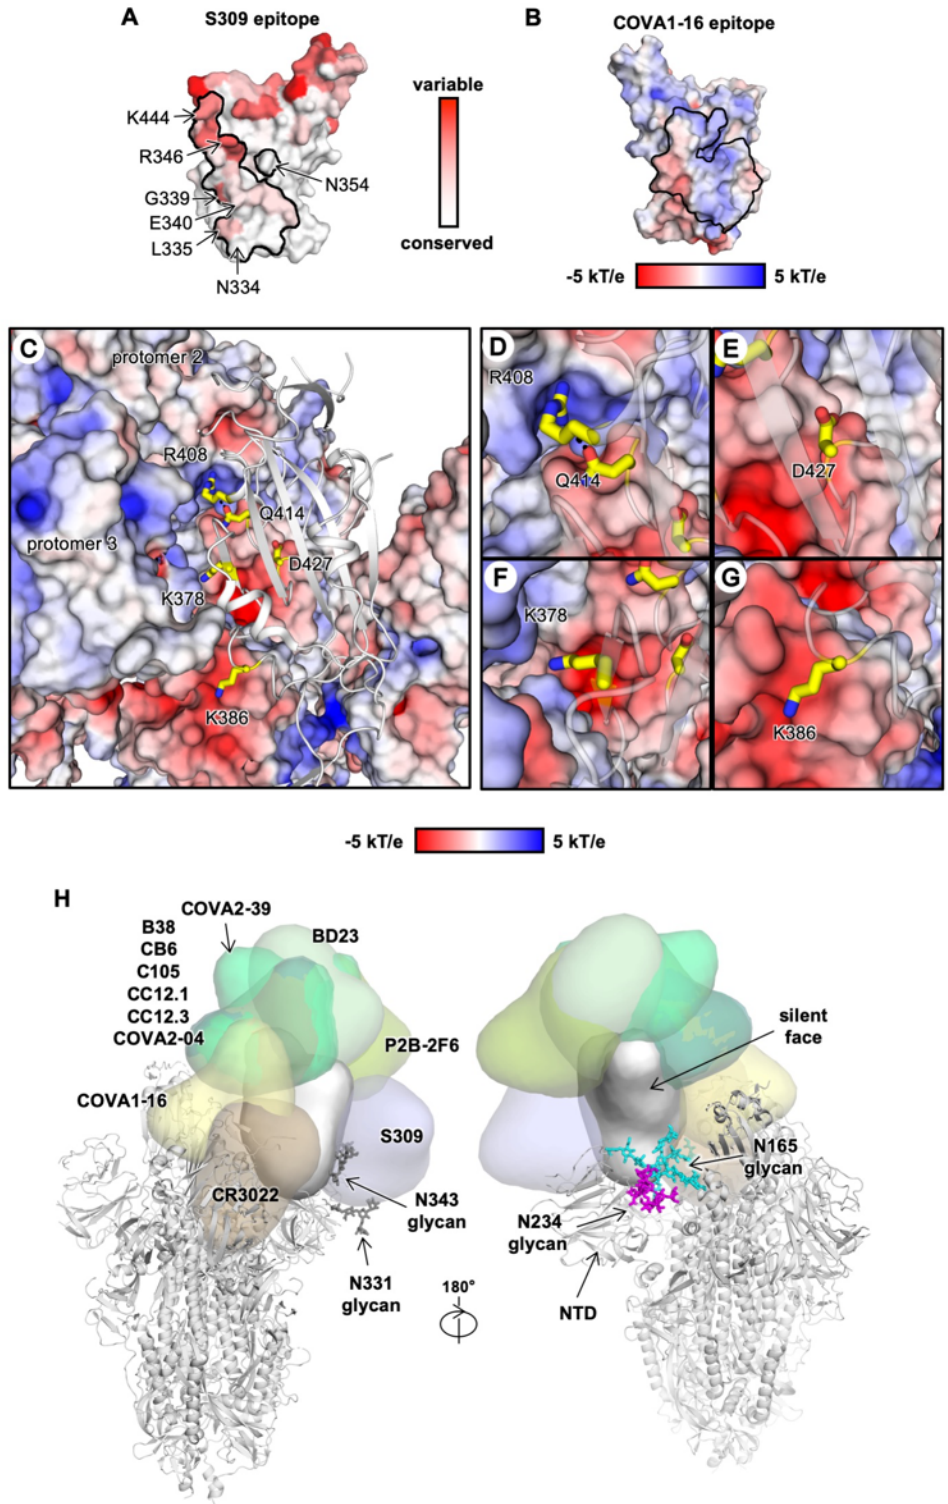

72

73 **Figure S5, related to Figures 4 and 5. Sequence conservation of S309 epitope and**

74 **additional structural analyses on COVA1-16 epitope. (A) Sequence conservation of**

75 the RBD is highlighted on the structure for S309 epitope (Pinto et al., 2020). This view  
76 corresponds to the opposite side (rotated 180 degrees along the vertical axis) from that  
77 shown in Figure 4A-B. **(B)** The epitope of COVA1-16 is outlined and is mainly polar in  
78 character. **(C)** The RBD of one of the three protomers is shown as a gray cartoon with the  
79 side chains of five residues of interest shown in yellow stick representation. RBD residues  
80 K378, R408, Q414, and D427 are within the COVA1-16 epitope, whereas K386 is not a  
81 COVA1-16 epitope residue. The other two protomers (protomers 2 and 3) are shown in a  
82 surface electrostatic representation. **(D-G)** Zoomed-in views for the regions surrounding  
83 residues **(D)** R408 and Q414, **(E)** D427, **(F)** K378, and **(G)** K386. A hydrogen bond in **(D)**  
84 is represented by a dashed line. Due to charge difference or similarity between the side  
85 chain and the proximal region of the neighboring protomer, either repulsive (same charge)  
86 or attractive (opposite charge) environments are found and visualized here. PDB 6VXX is  
87 used to represent the spike protein (Walls et al., 2020). Of note, the shape  
88 complementarity values ( $Sc$ ) (Lawrence and Colman, 1993) of the COVA1-16  
89 epitope/RBD interface, COVA1-16 epitope/S2 interface, and COVA1-16 epitope/COVA1-  
90 16 interface are 0.53, 0.75, and 0.74, respectively, indicating good complementarity and  
91 tight fit of the COVA1-16 epitope surface with the rest of the trimer in the RBD down  
92 conformation.  $Sc$  values can range from 0 to 1, with a larger  $Sc$  value represents higher  
93 shape complementarity. **(H)** The antibody-bound RBD is shown in the up conformation on  
94 the S protein (PDB 6VSB) (Wrapp et al., 2020). N-glycans on N165 (NTD), N234, N331,  
95 and N343 (RBD) are modelled according to the main glycoform observed at these sites in  
96 (Watanabe et al., 2020) and shown in stick representation. Antibody Fabs from published  
97 crystal and cryo-EM structures are represented as globular outlines in different colors.  
98 B38, CB6, C105, CC12.1, CC12.3, COVA2-04, COVA2-39, BD23, P2B-2F6 all bind at or  
99 around the receptor binding site. S309 binds to the elongated accessible face of the RBD

100 in both up and down conformations, and CR3022 binds to the opposite face that is  
101 exposed in the RBD up conformation, but buried in the RBD down conformation.

102  
103

**Table S1, related to Figure 1. X-ray data collection and refinement statistics**

| <b>Data collection</b>                          |                               |                             |
|-------------------------------------------------|-------------------------------|-----------------------------|
|                                                 | COVA1-16 Fab + SARS-CoV-2 RBD | COVA1-16 Fab                |
| Beamline                                        | SSRL 12-1                     | SSRL 12-1                   |
| Wavelength (Å)                                  | 0.97946                       | 0.97946                     |
| Space group                                     | <i>P</i> 1 2 <sub>1</sub> 1   | <i>P</i> 4 <sub>1</sub> 3 2 |
| Unit cell parameters                            |                               |                             |
| <i>a</i> , <i>b</i> , <i>c</i> (Å)              | 57.4, 124.9, 57.6             | 156.3, 156.3, 156.3         |
| $\alpha$ , $\beta$ , $\gamma$ (°)               | 90, 96.1, 90                  | 90, 90, 90                  |
| Resolution (Å) <sup>a</sup>                     | 50.0-2.89 (2.95-2.89)         | 50.0-2.53 (2.58-2.53)       |
| Unique reflections <sup>a</sup>                 | 17,656 (845)                  | 22,357 (1,084)              |
| Redundancy <sup>a</sup>                         | 3.7 (3.2)                     | 37.0 (14.1)                 |
| Completeness (%) <sup>a</sup>                   | 97.9 (93.9)                   | 100.0 (100.0)               |
| $\langle I/\sigma \rangle$ <sup>a</sup>         | 7.4 (1.2)                     | 21.5 (1.3)                  |
| $R_{\text{sym}}^b$ (%) <sup>a</sup>             | 15.3 (69.1)                   | 23.6 (>100)                 |
| $R_{\text{pim}}^b$ (%) <sup>a</sup>             | 9.0 (42.9)                    | 3.8 (54.3)                  |
| CC <sub>1/2</sub> <sup>c</sup> (%) <sup>a</sup> | 96.3 (66.8)                   | 99.6 (52.1)                 |
| <b>Refinement statistics</b>                    |                               |                             |
| Resolution (Å)                                  | 42.8-2.89                     | 34.1-2.53                   |
| Reflections (work)                              | 17,632                        | 21,872                      |
| Reflections (test)                              | 948                           | 1,069                       |
| $R_{\text{cryst}}^d$ / $R_{\text{free}}^e$ (%)  | 23.7/29.4                     | 21.2/24.4                   |
| No. of atoms                                    | 4,873                         | 3,284                       |
| Macromolecules                                  | 4,845                         | 3,223                       |
| Glycans                                         | 28                            | -                           |
| Average <i>B</i> -values (Å <sup>2</sup> )      | 49                            | 43                          |
| Macromolecules                                  | 49                            | 43                          |
| Fab                                             | 45                            | 43                          |
| RBD                                             | 56                            | -                           |
| Glycans                                         | 89                            | -                           |
| Wilson <i>B</i> -value (Å <sup>2</sup> )        | 43                            | 40                          |
| <b>RMSD from ideal geometry</b>                 |                               |                             |
| Bond length (Å)                                 | 0.004                         | 0.007                       |
| Bond angle (°)                                  | 0.74                          | 1.02                        |
| <b>Ramachandran statistics (%)<sup>f</sup></b>  |                               |                             |
| Favored                                         | 95.9                          | 96.7                        |
| Outliers                                        | 0.16                          | 0.0                         |
| <b>PDB code</b>                                 |                               |                             |
|                                                 | 7JMW                          | 7JMX                        |

104  
105  
106  
107  
108  
109  
110  
111  
112

<sup>a</sup> Numbers in parentheses refer to the highest resolution shell.

<sup>b</sup>  $R_{\text{sym}} = \sum_{hkl} \sum_i |I_{hkl,i} - \langle I_{hkl} \rangle| / \sum_{hkl} \sum_i I_{hkl,i}$  and  $R_{\text{pim}} = \sum_{hkl} (1/(n-1))^{1/2} \sum_i |I_{hkl,i} - \langle I_{hkl} \rangle| / \sum_{hkl} \sum_i I_{hkl,i}$ , where  $I_{hkl,i}$  is the scaled intensity of the  $i^{\text{th}}$  measurement of reflection  $h, k, l$ ,  $\langle I_{hkl} \rangle$  is the average intensity for that reflection, and  $n$  is the redundancy.

<sup>c</sup> CC<sub>1/2</sub> = Pearson correlation coefficient between two random half datasets.

<sup>d</sup>  $R_{\text{cryst}} = \sum_{hkl} |F_o - F_c| / \sum_{hkl} |F_o| \times 100$ , where  $F_o$  and  $F_c$  are the observed and calculated structure factors, respectively.

<sup>e</sup>  $R_{\text{free}}$  was calculated as for  $R_{\text{cryst}}$ , but on a test set comprising 5% of the data excluded from refinement.

<sup>f</sup> From MolProbity (Chen et al., 2010).

113 **Table S2, related to Figure 1. Hydrogen bonds identified in the antibody-RBD**  
 114 **interface using the PISA program**  
 115  
 116

| <b>COVA1-16 Fab</b> | <b>Distance<br/>[Å]</b> | <b>SARS-CoV-2 RBD</b> |
|---------------------|-------------------------|-----------------------|
| H:ARG100b[NH2]      | 3.3                     | A:TYR369[O]           |
| H:ARG100b[NE]       | 3.9                     | A:SER371[O]           |
| H:ARG100b[N]        | 3.8                     | A:PHE377[O]           |
| H:TYR100[N]         | 2.6                     | A:CYS379[O]           |
| H:GLN101[NE2]       | 3.1                     | A:GLN414[OE1]         |
| H:ARG97[NH1]        | 2.5                     | A:ASP427[O]           |
| H:TYR32[OH]         | 3.1                     | A:ASP427[OD1]         |
| H:THR28[ N]         | 3.2                     | A:ASP427[OD2]         |
| H:ARG97[NH1]        | 3.0                     | A:PHE429[O]           |
| H:TYR100[O]         | 2.9                     | A:CYS379[N]           |
| H:SER100c[O]        | 3.3                     | A:THR385[OG1]         |
| H:GLN101[OE1]       | 3.8                     | A:GLN414[NE2]         |
| L:ASN53[OD1]        | 3.2                     | A:ARG408[NH2]         |
| L:LEU54[O]          | 3.7                     | A:ARG408[NE]          |
